# Supplementary material for: A new perspective on the photocatalytic action of titanium dioxide on phenol elucidated using comprehensive multiphase NMR
Source: Royal Society of Chemistry journal article supplement (doi:10.1039/d2nr01911f), 2022-01-01
Supplement: d2nr01911f1.pdf [file d2nr01911f1.pdf]

Electronic Supplemental Information for

“A new perspective on the photocatalytic action of titanium dioxide on phenol elucidated using  
Comprehensive Multiphase NMR”

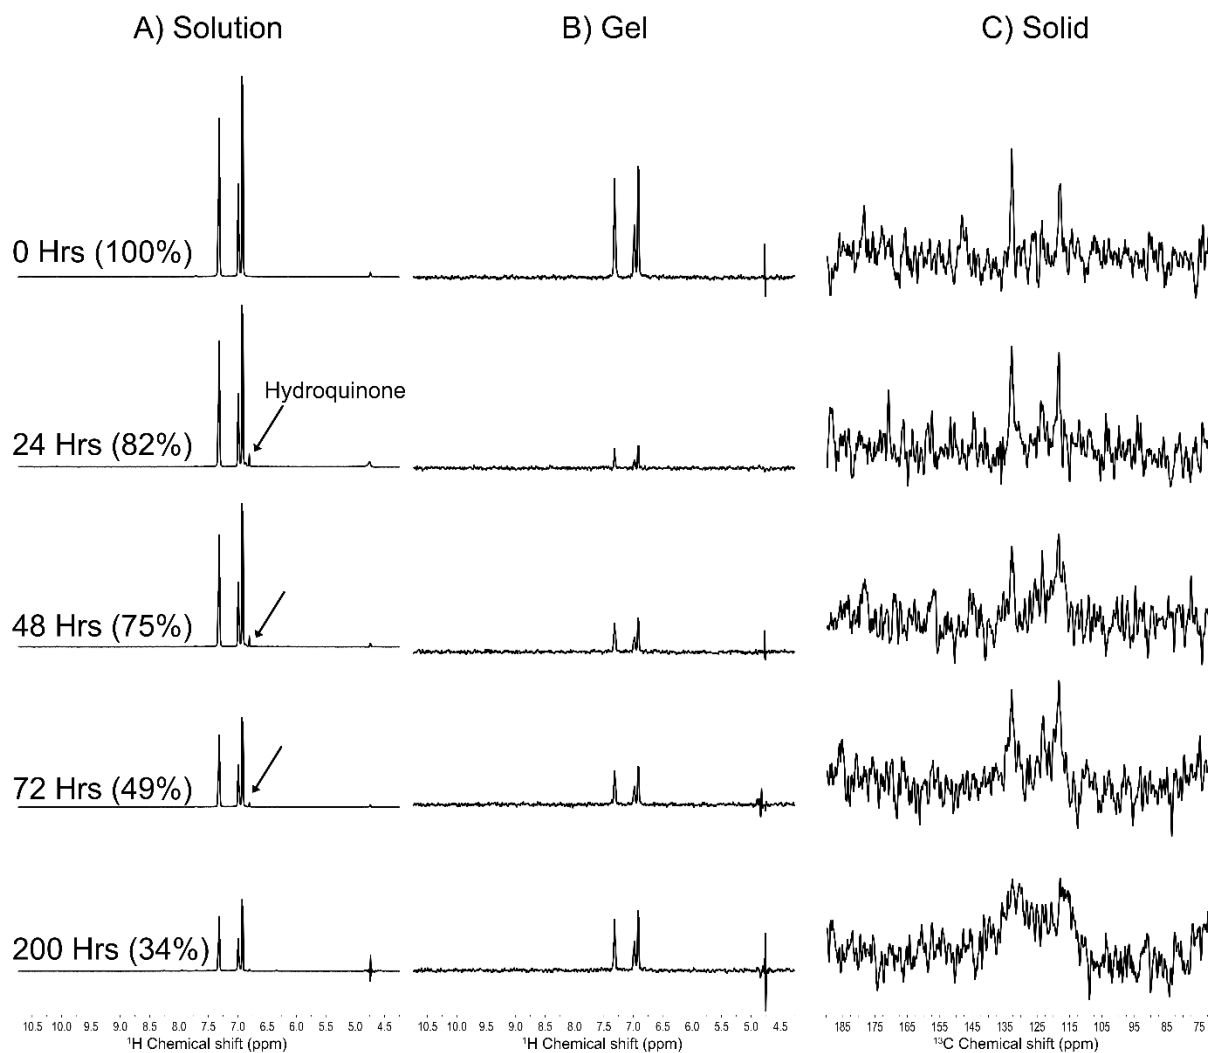

Figure S1: Extended NMR spectrum of figure 3 showing full aromatic region.

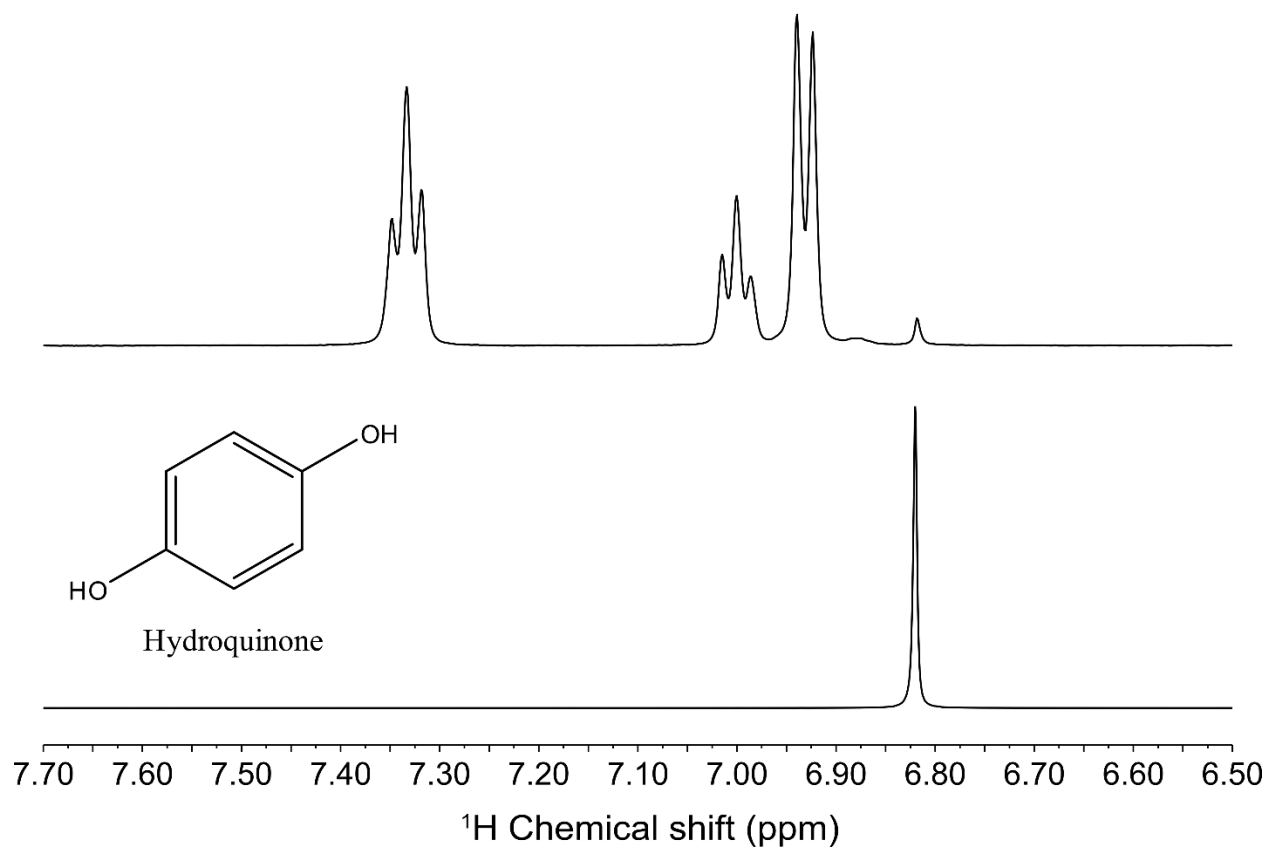

Figure S2: Comparison of chemical shift of Phenol + P25 after 24hrs illumination and hydroquinone standard (Alfa Aesar #L02558 ).
